# Supplementary material
Source: MDPI journal article supplement (https://www.mdpi.com/2076-3298/10/7/115)
Supplement: s1 [file s1 › environments-2454874-supplementary.pdf]

# **Supplementary materials**

## **Title**

Uncovering the Hidden Dangers of Microplastic Pollution in Lake Ecosystems: Effects of Ingestion  
on Talitrid Amphipods

## **Authors**

Camilla Ciotti<sup>1</sup>, Andrea Setini<sup>2</sup>, Francesca Lecce<sup>1</sup> and Valentina Iannilli<sup>1\*</sup>

## **Affiliation**

<sup>1</sup>ENEA, Italian National Agency for New Technologies, Energy and Sustainable Economic  
Development, C.R. Casaccia, Via Anguillarese, 301, 00123 Rome, Italy

<sup>2</sup> Department of Biology and Biotechnologies 'Charles Darwin', Sapienza University of Rome,  
Piazzale Aldo Moro 5, 00185 Rome, Italy

## **\*Corresponding author:**

Valentina Iannilli

Table S1. Size of the microplastic particles used in DECOTABs

| <b>Particles size(<math>\mu\text{m}</math>)</b> |                  |                 |
|-------------------------------------------------|------------------|-----------------|
|                                                 | Lenght           | Width           |
| mean                                            | 22,747           | 11,448          |
| SD                                              | 28,568           | 13,307          |
| Dimensional range                               | 4,055<br>156,783 | 1,969<br>72,489 |

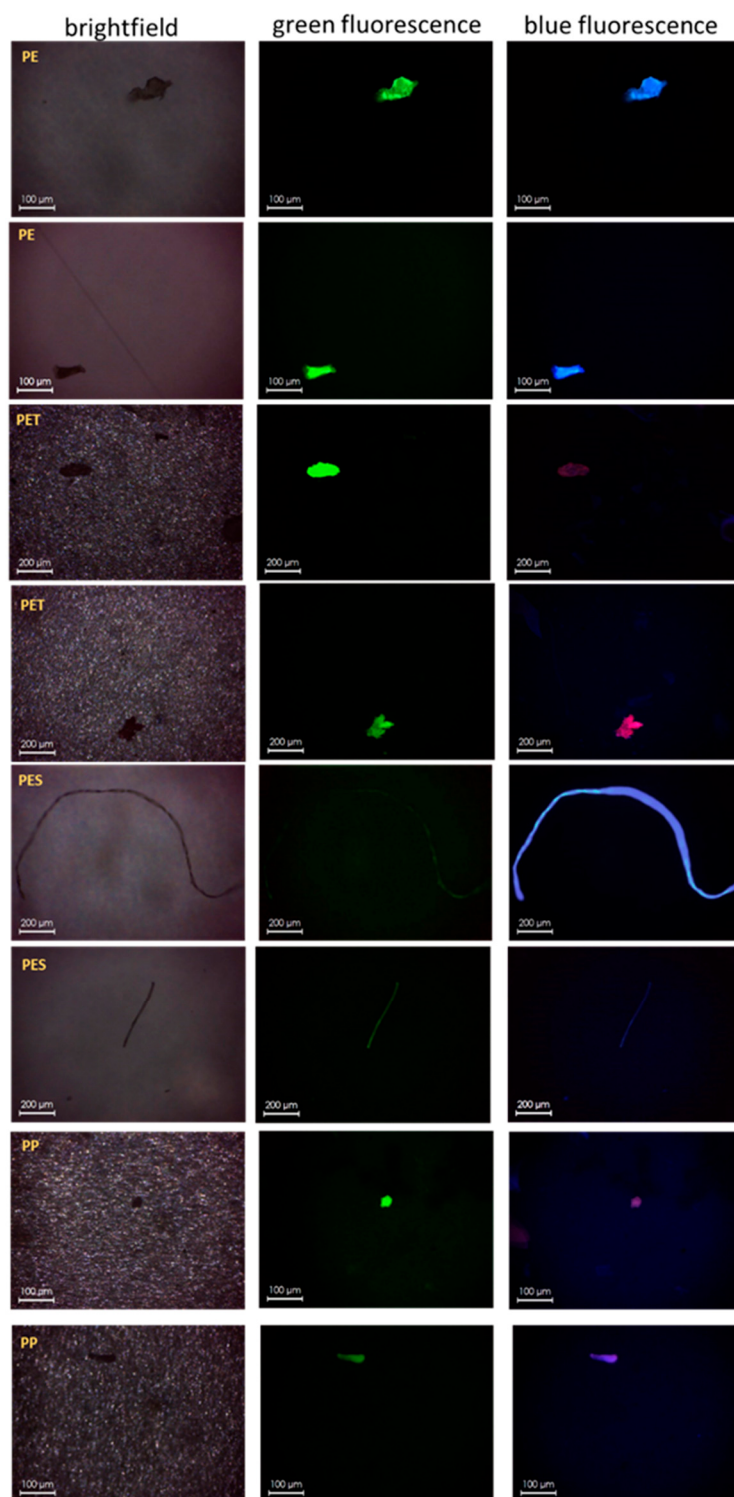

Figure S1. Images in brightfield (left) and fluorescence microscope in green (middle-excitation wavelength at 450–490 nm and emission wavelength 515–565 nm) and in blue (right-excitation at 365 nm and 445 nm emission) after Nile Red staining of the microplastics from digestive tracts of *Cryptorchestia garbinii*.
